# Supplementary material for: Identification of Oxygenation Impairment–Associated Gene Networks in ARDS Through Integrated mRNA and miRNA Analysis
Source: Research Square preprint supplement (doi:10.21203/rs.3.rs-8776914/v1), 2026-02-22
Supplement: Supplementary file 1 [file 3e25ea4a33d7860630f47b75.docx]

**Additional file 1**

**Supplementary Methods**

**Library preparation and sequencing**

For mRNA sequencing (mRNA-Seq), 200 ng of total RNA was used as input, and complementary DNA (cDNA) was synthesized using the SMART-Seq HT kit (Takara Bio, Mountain View, CA). Sequencing libraries were prepared with the Nextera DNA Library Preparation Kit (Illumina) and subsequently converted to DNBSEQ-compatible libraries using the MGIEasy Universal Library Conversion Kit (MGI Tech). mRNA libraries were sequenced on the DNBSEQ-G400RS platform using 2 × 100 bp paired-end reads.

For miRNA sequencing (miRNA-Seq), 100 ng of total RNA was used as input. Small RNA libraries were prepared using the NEBNext Small RNA Library Prep Set for Illumina (New England Biolabs, Ipswich, MA, USA) and sequenced on a NovaSeq 6000 platform (Illumina) with 101 bp single-end reads.

**RNA-seq data processing and normalization**

For mRNA-Seq, raw sequence reads were aligned to the human reference genome (hg19) using TopHat (v2.1.1) in combination with Bowtie2 (v2.2.8) and SAMtools (v0.1.18). Gene-level read counts were generated using featureCounts from the Subread package (v2.0.0). For miRNA-Seq, 3′ adapter sequences were removed using Cutadapt (v3.2). The reads were mapped and quantified against miRBase (v22.1) and the RIKEN FANTOM5 human miRNA atlas using miRDeep2 (v2.0.1.3). For mature miRNAs represented by multiple precursors, raw read counts were summed based on mature miRNA identifiers.

Low-expression filtering was applied before downstream analyses. For mRNAs, genes with counts per million (CPM) > 1 in at least 10 samples (approximately 20% of the cohort) were retained. For miRNAs, reads per million (RPM) > 1 in at least 25 samples (approximately 50% of the cohort) were retained. Filtered count data were normalized using the trimmed mean of M-values method implemented in the edgeR package, followed by log-transformation of CPM or RPM values [1].

**Differential expression analysis**

Differential expression analysis between patients with ARDS and healthy controls was performed using the voom–limma pipeline [2]. Differentially expressed genes were defined as mRNAs with an adjusted p value of <0.05 and a |log₂ fold change (FC)| of >1. Differentially expressed miRNAs (DEmiRNAs) were defined as miRNAs with an adjusted p value of <0.05 and a |log₂FC| of >0.3, reflecting the smaller dynamic range of miRNA expression compared with mRNA expression. The differential expression results were visualized using volcano plots and heat maps. Gene Ontology (GO) and Kyoto Encyclopedia of Genes and Genomes (KEGG) pathway enrichment analyses were conducted to identify DEGs.

**Weighted Gene Co-expression Network Analysis**

Weighted Gene Co-expression Network Analysis (WGCNA) was performed exclusively on samples from patients with ARDS. To focus on highly variable genes, the top 50% genes ranked by median absolute deviation were selected. Co-expression networks were constructed using the WGCNA package in R . An appropriate soft-thresholding power (β) was determined based on the scale-free topology fit index (R²). Co-expression modules were identified using the BlockwiseModule function. Module eigengenes (MEs), defined as the first principal components of each module, were correlated with clinical traits to identify clinically relevant modules. Modules exhibiting strong associations with clinical parameters were subjected to GO and KEGG enrichment analyses. Correlations between the mRNA and miRNA module eigengenes were calculated to identify the major interacting module pairs. Within these modules, hub features were defined based on the module eigengene–based connectivity (kME, also referred to as module membership). The hub definitions are as follows:

Hub mRNAs: kME > 0.7, gene significance (correlation with clinical traits) > 0.3

・Hub miRNAs: kME > 0.6

The predicted targets of the hub miRNAs were identified using TargetScan. Predicted miRNA–mRNA regulatory pairs were defined as genes shared between hub mRNAs and predicted miRNA targets. Experimentally validated miRNA–mRNA interactions were extracted using miRTarBase. These predicted and validated interactions were used to construct an miRNA–mRNA regulatory network.

**Single-sample gene set enrichment analysis**

Single-sample gene set enrichment analysis (ssGSEA) was performed using the Gseapy package in Python. ssGSEA scores were calculated for the predicted and validated gene sets derived from the integrated miRNA–mRNA network. Patients were stratified into “high” and “low” signature score groups based on the median ssGSEA score, and clinical variables were compared between these groups.

**Pneumonia cohort analysis**

An external cohort consisting of 41 hospitalized patients with pneumonia and available mRNA and miRNA expression data was analyzed. The pneumonia cohort was assembled from publicly available Gene Expression Omnibus datasets (GSE182152, GSE243219, and GSE228542).

The cohort included patients with acute respiratory failure related to pneumonia, coronavirus disease 2019, or sepsis. All datasets contained peripheral blood–derived transcriptomic data, with samples collected within 24 hours of hospital admission. These datasets were originally generated to investigate the molecular and immunological responses to respiratory infections and systemic inflammation. The pneumonia cohort was used to examine the behavior of gene modules identified in the ARDS cohort in a population that did not meet the criteria for ARDS but shared a common clinical background of hypoxemia requiring oxygen therapy.

**Assessment of network reproducibility and module preservation**

To evaluate the reproducibility of miRNA–mRNA interactions, predicted and validated miRNA–mRNA pairs identified in the ARDS cohort were mapped onto the pneumonia cohort. Pearson’s correlation coefficients were calculated for each miRNA–mRNA pair and visualized as correlation matrices. Preservation of hub-level interactions was assessed by calculating the Pearson’s correlation coefficients for all hub miRNA–hub mRNA pairs and comparing correlation patterns between cohorts. Network-level preservation was further evaluated by comparing the correlation coefficients across cohorts. Module structure preservation was assessed using module eigengene–based connectivity. Genes assigned to the turquoise module in the ARDS cohort were applied to the pneumonia cohort, module eigengenes were recalculated, and kME values were computed for each gene. Preservation of the module structure was quantified by calculating the Pearson’s correlation coefficients between the kME values derived from the ARDS and pneumonia cohorts.

**Evaluation of network activity using an integrated score**

To quantify the biological activity of the miRNA–mRNA regulatory network, two gene sets were defined: an miRNA suppression set comprising hub miRNAs and an mRNA activation set comprising hub mRNAs. The enrichment scores (ES) were calculated for each set using ssGSEA. An integrated network activity score was calculated for each patient using the following formula:

Integrated score = (miRNA suppression ES) – (mRNA activation ES)

This approach reflects the canonical function of miRNAs as negative regulators of mRNA expression [3]. Patients were ranked according to the integrated score, and heat maps of hub gene expression were used to assess whether the characteristic patterns of miRNA upregulation and mRNA downregulation were reproduced in the pneumonia cohort.

**Supplementary References**

1. Robinson MD, McCarthy DJ, Smyth GK. edgeR: A Bioconductor package for differential expression analysis of digital gene expression data. Bioinformatics. 2010;26:139–40. <https://doi.org/10.1093/bioinformatics/btp616>

2. Law CW, Chen Y, Shi W, Smyth GK. voom: Precision weights unlock linear model analysis tools for RNA-seq read counts. Genome Biol. 2014;15:R29. <https://doi.org/10.1186/gb-2014-15-2-r29>

3. Guo H, Ingolia NT, Weissman JS, Bartel DP. Mammalian microRNAs predominantly act to decrease target mRNA levels. Nature. 2010;466:835–40. <https://doi.org/10.1038/nature09267>
